1 **The nuts and bolts of SARS-CoV-2 Spike Receptor Binding Domain heterologous**  
2 **expression**

3 Mariano Maffei<sup>1\*</sup>, Linda Celeste Montemiglio<sup>4</sup>, Grazia Vitagliano<sup>2</sup>, Luigi Fedele<sup>2†</sup>, Shaila  
4 Sellathurai<sup>2</sup>, Federica Bucci<sup>2</sup>, Mirco Compagnone<sup>3</sup>, Valerio Chiarini<sup>2</sup>, Cécile Exertier<sup>5</sup>,  
5 Alessia Muzi<sup>2</sup>, Giuseppe Roscilli<sup>1,2</sup>, Beatrice Vallone<sup>5</sup>, Emanuele Marra<sup>1,2\*</sup>

6

7 *1. Evvivax Biotech, Rome, Italy*

8 *2. Takis Biotech, Rome, Italy*

9 *3. Neomatrix Biotech, Rome, Italy*

10 *4. Institute of Molecular Biology and Pathology (IBPM), National Research Council, Rome,*  
11 *Italy*

12 *5. Department of Biochemical Sciences "A. Rossi Fanelli" University of Rome, Sapienza,*  
13 *Rome, Italy*

14

15 *†Present address: Luigi Fedele, InnovaVector s.r.l., Pozzuoli, Italy*

16

17 **\*Correspondence to:**

18 [maffei@takisbiotech.it](mailto:maffei@takisbiotech.it)

19 [marra@takisbiotech.it](mailto:marra@takisbiotech.it)

20

21 **Abstract**

22 COVID-19 is a highly infectious disease caused by a newly emerged coronavirus (SARS-  
23 CoV-2) that has rapidly progressed into a pandemic. This unprecedented emergency has  
24 stressed the significance of developing effective therapeutics to fight current and future  
25 outbreaks. The receptor-binding domain (RBD) of the SARS-CoV-2 surface Spike protein is  
26 the main target for vaccines and represents a helpful “tool” to produce neutralizing  
27 antibodies or diagnostic kits. In this work, we provide a detailed characterization of the native  
28 RBD produced in three major model systems: *Escherichia coli*, insect and HEK-293 cells.  
29 Circular dichroism, gel filtration chromatography and thermal denaturation experiments  
30 indicated that recombinant SARS-CoV-2 RBD proteins are stable and correctly folded. In  
31 addition, their functionality and receptor-binding ability were further evaluated through  
32 ELISA, flow cytometry assays and bio-layer interferometry.

33

34 **Keywords**

35 SARS-CoV-2; Receptor-Binding Domain; COVID-19; Spike protein; heterologous  
36 expression; protein production.

37

## 38 Introduction

39 At the end of 2019, a novel respiratory pathogen responsible for the COVID-19  
40 disease, namely severe acute respiratory syndrome-related coronavirus (SARS-CoV-2),  
41 emerged in Wuhan, China<sup>1</sup>. Only three months later, the virus spread worldwide causing  
42 one of largest outbreak of the century that rapidly progressed into pandemic with more than  
43 222 million of confirmed cases and 4,59 million deaths by September 9<sup>th</sup> <sup>2</sup>. In response to  
44 this exceptional situation, an enormous effort has been made by the scientific community to  
45 study and characterize the pathogen and to quickly develop safe and effective prophylactic  
46 and therapeutic drugs.

47 The SARS-CoV-2 is an enveloped virus whose surface is decorated with an integral  
48 membrane protein (M), an envelope protein (E), a surface spike protein (S), and an  
49 additional unexposed structural nucleocapsid protein (N)<sup>3,4</sup>. Among those, the Spike protein  
50 is critical to recognize the host-cell receptors and for mediating viral entry, therefore it  
51 represents the most studied viral component and the best candidate for drug target <sup>5,6</sup>. The  
52 140 kDa SARS-CoV-2 S protein is organized into two major subunits (S1 and S2) connected  
53 by a furin-cleavage site<sup>7</sup>. The S1 subunit contains the receptor-binding domain (RBD; aa  
54 319-541), a 25 kDa domain that is directly involved in the interaction with the Angiotensin-  
55 converting enzyme 2 (ACE2)<sup>8,9</sup>. RBD contains nine cysteines, including eight that form  
56 disulfide-bridges involved in the RBD fold. In addition, the domain displays two N-  
57 glycosylation sites (Asn<sub>331</sub> and Asn<sub>343</sub>) known to participate to folding, stability, and  
58 function<sup>10-12</sup>. Mutations occurring within this domain are constantly monitored to predict the  
59 emergence of novel variants that could be naturally selected and quickly spread, such as  
60 the recent isolated alpha (B.1.1.7), beta (B.1.351), gamma (P.1), and delta (B.1.617.2)  
61 variants of concern<sup>13-16</sup>.

62 RBD as isolated protein is broadly used in different types of clinical and medical  
63 applications (serological tests, vaccine formulation etc.)<sup>17–20</sup> and therefore its *in-vitro*  
64 production is of paramount importance. Mammalian and insect cells are the model systems  
65 of election used for the heterologous expression of SARS-CoV-2 RBD due to its intrinsic  
66 structural complexity. Attempts have also been made using other systems such as *Pichia*  
67 *pastoris*<sup>21</sup> or *Nicotiana benthamiana*<sup>22</sup>. Although *Escherichia coli* (*E. coli*) represents the  
68 most common organism employed for the expression of recombinant proteins, its usage is  
69 not recommended for challenging targets that require complex folding and/or post-  
70 translational modifications such as RBD. Nevertheless, *E. coli* gathers many technical and  
71 practical advantages (low-cost, easy handling) compared to other model systems that could  
72 be beneficial both for research-scale and large industrial production<sup>23</sup>.

73 In this study, we present a structural and functional comparison of the native RBD of  
74 SARS-CoV-2, recombinantly produced in the three major and most frequently used  
75 expression systems (*E. coli*, insect and mammalian HEK-293 cells). The characterization of  
76 recombinant RBD proteins is of the utmost relevance in drug design to tackle the Covid-19  
77 pandemic.

78

## 79 **Abbreviations**

80 ACE2, angiotensin-converting enzyme 2; BLI, bio-layer interferometry; CD, circular  
81 dichroism; COVID-19, coronavirus disease-2019; ELISA, enzyme-linked immunosorbent  
82 assay; FACS, fluorescence-activated cell sorting; HEK, human embryonic kidney; IgG,  
83 immunoglobulin G; IMAC, immobilized metal affinity chromatography; MALDI-MS, matrix-  
84 assisted laser desorption/ionization- mass spectrometry; MFI, mean fluorescence intensity/  
85 geometric mean; MS, mass spectrometry; MW, molecular weight; MWCO, molecular weight  
86 cut-off; OD, optical density; PMF, peptide mass fingerprint; PMTV, photomultiplier voltage;

87 POI, protein of interest; RBD, receptor binding domain; *E. coli*-RBD, receptor binding domain  
88 produced in *E. coli*; HEK-293-RBD, receptor binding domain produced in HEK293 cells;  
89 insect-RBD, receptor binding domain produced in insect cells; RP-UHPLC-MS, reversed-  
90 phase - ultra-high performance liquid chromatography - mass spectrometry; SARS-CoV-2,  
91 severe acute respiratory syndrome coronavirus 2; SEC, size exclusion chromatography; T<sub>m</sub>,  
92 melting temperature; UHPLC, ultra-high performance liquid chromatography; WHO, World  
93 Health Organization;

94

## 95 **Results**

### 96 *Design, expression, and purification of SARS-CoV-2 RBD in E. coli*

97 The RBD protein (Figure 1(a)) was recombinantly expressed with a C-terminal 6x-His  
98 purification tag both in BL-21 *Star* and Lemo21 cells. The Lemo21 bacterial strain allows to  
99 express challenging targets such as toxic, highly insoluble, and membrane proteins by  
100 reducing inclusion body formation and potential inhibitory effects on cells growth, thus  
101 resulting in an increased level of properly folded products. However, only negligible amount  
102 of RBD was found in the soluble fraction, even exploring alternative growing conditions  
103 including lower temperature, distinct induction times, and increasing concentrations of L-  
104 Rhamnose (data not shown). The target protein was totally recovered from inclusion bodies  
105 with yields representing 5.2% (*Star*) and 8.1% (Lemo21) of the total protein extract (Figure  
106 1(b), Suppl. Figure 1 (a)). Protein purification was carried out in the presence of denaturing  
107 agents (6 M urea) followed by a slow refolding-process through an over-night dialysis  
108 against buffer containing the redox pair of oxidized and reduced glutathione to induce proper  
109 disulfide bond formation (Figure 1(b), Suppl. Figure 1(b)). As shown in Figure 1(c), the  
110 purified *E. coli*-RBD protein shows a high degree of purity (>90%) and migrated as a single-  
111 smeared band at the expected height on 4-12% SDS-PAGE (theoretical mass, 26052 Da).

112 Moreover, Western blot analysis indicated that the protein was efficiently recognized by anti-  
113 His and anti-SARS-CoV-2 Spike S1 subunit antibodies (Figure 1(c)). Approximately 1.25 mg  
114 of purified RBD was obtained starting from 0.5 L of bacterial culture (final yield ~2.5 mg/L).  
115 Among distinct batches, concentration ranged from 0.1 mg/mL (3.8  $\mu$ M) to 0.3 mg/mL (11.5  
116  $\mu$ M). Concentrations higher than 0.3 mg/mL led to protein precipitation. Finally, the  
117 molecular weight and primary aminoacidic sequence of SARS-CoV-2 RBD purified from *E.*  
118 *coli* were further validated by Mass-spec analysis (Suppl. Figure 1(c),(d)).

119

#### 120 *Design, expression, and purification of SARS-CoV-2 RBD in insect and mammalian cells*

121 RBD fragment with a C-terminal 8x-His purification tag and was cloned downstream  
122 of the gp64 for expression in insect cells (Figure 1(a)). Generation and amplification of  
123 recombinant baculovirus were carried out in Sf21 cells, while protein expression was  
124 performed in Hi-5 infected insect cells (Figure 1(b)). The soluble protein of interest (POI)  
125 was secreted into culture media and purified through Immobilized Metal Affinity  
126 Chromatography (IMAC) using a Ni-Nta resin (Figure 1(b), Suppl. Figure 2(a)). Isolated  
127 insect-RBD migrated as a single band slightly higher than 25 kDa on 4-12% SDS-PAGE  
128 (theoretical mass, 26266 Da) exhibiting a high level of purity (>95%), and it was clearly  
129 detected by immunoblotting (anti-His and anti- SARS-CoV-2 Spike S1 subunit) (Figure 1(d)).  
130 At a laboratory-scale, final yields were around 6.5 mg RBD per Liter of insect cells with batch  
131 concentrations ranging from 0.25 mg/mL (9.5  $\mu$ M) to 0.5 mg/mL (19  $\mu$ M). The experimental  
132 mass (28936 Da) of the recombinant insect-RBD determined by MALDI mass-spectrometry  
133 analysis (Suppl. Figure 2(b),(c)) was higher than the theoretical one based on the amino  
134 acid composition, thus suggesting the presence of glycosylations<sup>24</sup>.

135 Regarding RBD expression in mammalian cells, SARS-CoV-2 RBD flanked by a C-  
136 terminal 6x-His tag was cloned downstream the Ig Kappa chain-signal peptide responsible

137 for protein secretion (Figure 1(a)). Cells were transfected with DNA and left under stirring  
138 and controlled CO<sub>2</sub> atmosphere for 1 week expressing the POI. The RBD-containing  
139 medium was filtrated and the POI was purified by affinity chromatography (Figure 1(b),  
140 Suppl. Figure 2(d)). The eluted protein migrates as a single-slightly diffuse band below 37  
141 kDa, indicating that RBD (theoretical mass, 26135 Da) contains glycosylations. Indeed,  
142 experimental mass obtained from MALDI-MS analysis was 31453 Da, confirming the  
143 presence of post-translation modifications as previously reported<sup>21,25,26</sup> (Suppl. Figure  
144 2(e),(f)). Additionally, the eluted protein was efficiently detected by anti-His and anti-S1  
145 subunit of SARS-CoV-2 Spike antibodies (Figure 1(d)). Around 800 mL of transfected cells  
146 yielded 58.8 mg of pure purified protein, with batch concentrations reaching up to 1.8 mg/mL  
147 (69 μM).

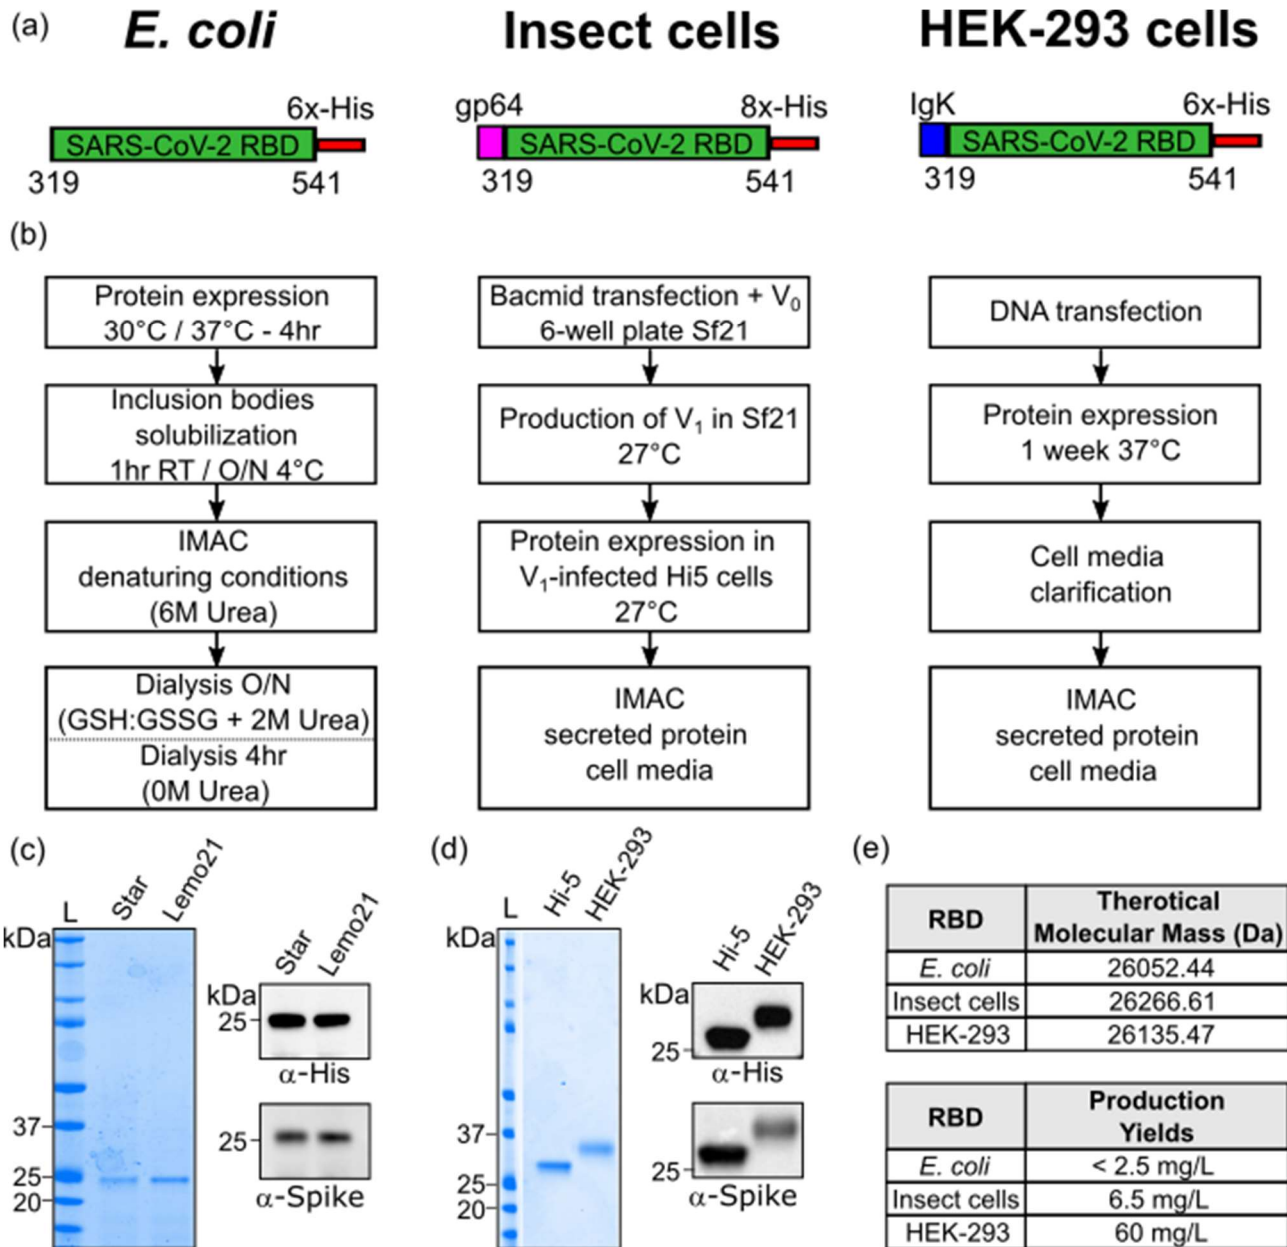

148

149 **Figure 1. SARS-CoV-2 RBD production in *E. coli*, insect and mammalian cells.** (a)  
 150 Schematic representation of the RBD protein constructs expressed in *E. coli* (left), insect  
 151 cells (middle), and mammalian HEK-293 cells (right). (b) Diagram summarizing the RBD  
 152 recombinant expression from *E. coli* (left), insect cells (middle), and mammalian HEK-293  
 153 cells (right) and the subsequent purification. (c) SDS-PAGE (left panel) and Western blot  
 154 analysis (right panels) of *E. coli*-purified RBD protein. (d) SDS-PAGE (left panel) and  
 155 Western blot analysis (right panels) of RBD fragment produced in Hi-5 insect cells and  
 156 mammalian HEK-293. L = molecular weight ladder (e) Theoretical molecular masses



157 calculated according to RBD amino acid composition (above) and RBD production yields  
158 (below).

159

#### 160 *Biochemical characterization of RBD*

161 RBD produced in HEK-293, insect cells and *E. coli* were analyzed by size exclusion  
162 chromatography (SEC) (Figure 2(a)). *E. coli*-RBD elutes as a single and narrow peak  
163 centered at 18.7 mL whereas RBD proteins produced in HEK-293 and insect cells display  
164 elution peaks shifted to lower retention volumes owing to the presence of glycosylations. In  
165 fact, HEK-293-RBD elutes as a main peak centered at 15.3 mL, while RBD produced in  
166 insect cells elutes as a major one centered at 16 mL and a minor one at 14.6 mL. The  
167 presence of two peaks in the insect-RBD elution profile suggests the existence of at least  
168 two populations of the protein showing alternative glycosylation patterns and differing from  
169 the one of HEK-293-RBD. The lack of glycosylation of *E. coli*-RBD shifts the retention  
170 volumes to higher values. Altogether, all the elution peaks observed are all consistent with  
171 a ~30 kDa protein.

172 RBD proteins were analyzed by far-UV CD spectroscopy. The spectral profiles of  
173 HEK-293-RBD and insect-RBD reported in Figure 2(b) are by-an-large identical, both  
174 displaying a single minimum at ~206 nm and a maximum at ~230 nm. Conversely, the far-  
175 UV CD spectrum of *E. coli*-RBD differs from those of the eukaryotic counterparts, as also  
176 observed by Mycroft-West et al<sup>27</sup>. However, the analysis of the secondary structure  
177 composition returned an overall similar distribution (Figure 2(c)).

178 The conformational stability of RBDs was investigated by means of temperature  
179 denaturation experiments: we followed the variations in far-UV CD ellipticity at 222 nm upon  
180 increase of temperature from 290 K to 360 K (Figure 2(d)). The change in ellipticity,  
181 monitored for each construct, followed a sigmoidal dependence upon temperature increase,

182 suggesting that the RBDs reversibly unfold. Differently to what expected for a typical folded-  
183 to-unfolded transition followed by far-UV CD, the ellipticity values decrease with raising  
184 temperature (no loss of CD signal).

185 The observed denaturation curves could be well fitted to a 2-state transition according  
186 to equation (1). The resulting  $T_m$  values are identical within experimental error, yielding a  
187 mean value of  $323.1 \pm 0.6$  K for HEK-293-RBD,  $323.1 \pm 1.4$  K for insect-RBD, and  $322.7 \pm$   
188  $1.3$  K for *E. coli*-RBD over three independent experiments. The estimated  $T_m$  values are  
189 consistent to what previously reported for RBD produced in eukaryotic cells in similar ionic  
190 strength conditions<sup>21</sup>. It is worth mentioning that the denaturation curve of *E. coli*-RBD shows  
191 a biphasic behaviour, indicating the existence of an initial unfolding event preceding the  
192 main one and taking place around 305 K (data not shown). We surmise that this initial phase  
193 is likely due to a minor portion of the protein that failed refolding during sample purification  
194 from inclusion bodies, probably owing to the absence of glycosylations.

195

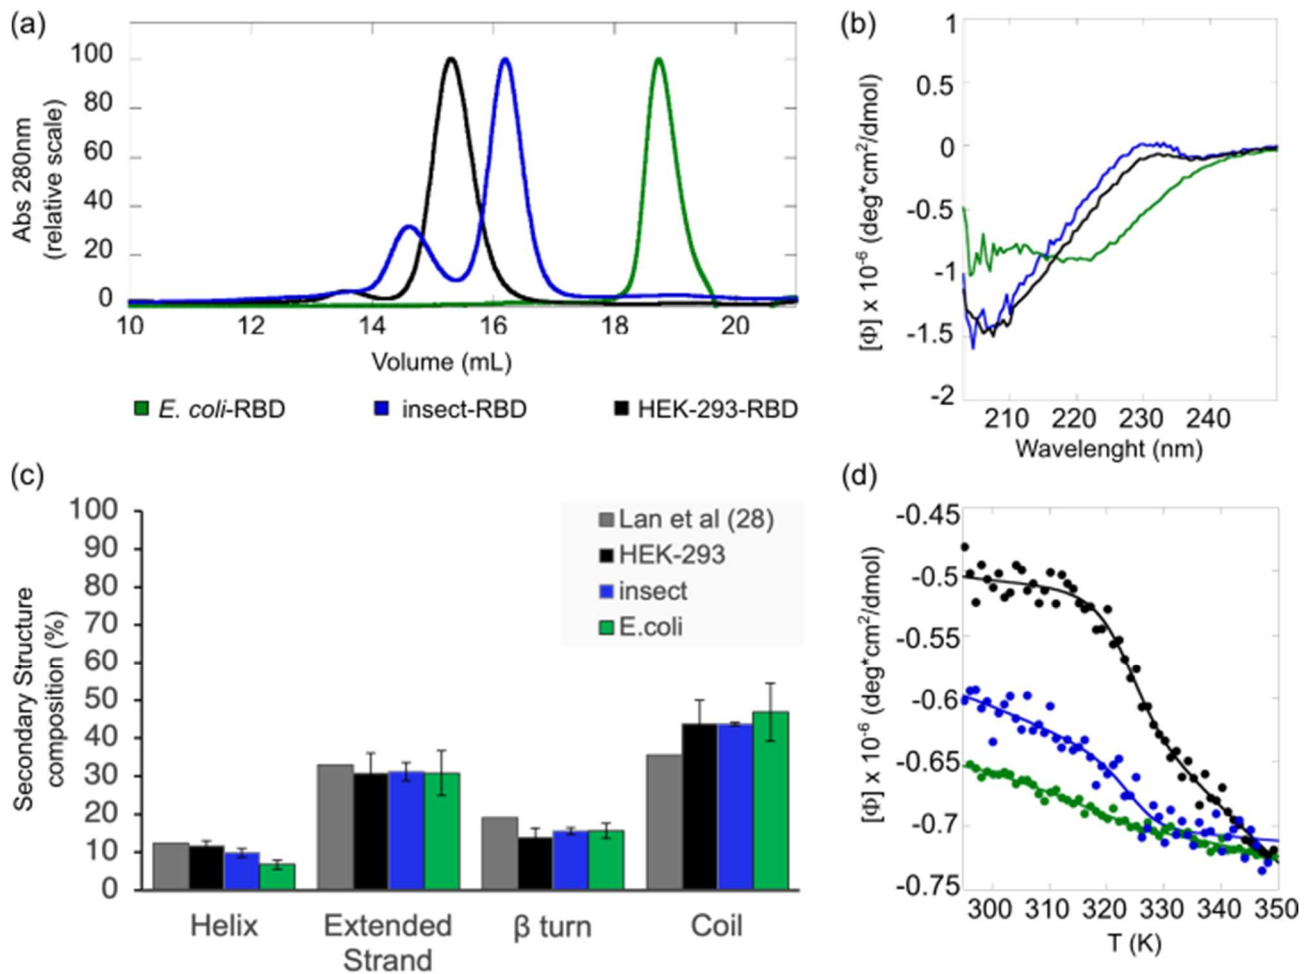

196

197 **Figure 2. Biochemical characterization of recombinant RBD.** (a) Gel filtration  
198 chromatographic profiles. Protein separation was performed at room temperature using a  
199 Superdex 200 Increase 10/300 GL with 40  $\mu$ g of RBD produced in HEK-293 (black), 47  $\mu$ g  
200 of RBD produced in insect (blue), 40  $\mu$ g of RBD produced in *E. coli* (green), each in 50 mM  
201 Tris·HCl, 150 mM NaCl, pH 8.3. (b) Far-UV CD spectra of RBD produced in HEK-293  
202 (black), insect (blue) and *E. coli* (green) cells. All spectra were collected at 20°C, using a 0.1  
203 cm path length quartz cuvette. (c) The histogram reports the distribution of the secondary  
204 structure content determined for the RBD proteins (at least three independent CD  
205 experiments (mean  $\pm$  standard deviation)), in comparison with the secondary structure  
206 composition of RBD reported by Lan et al. (dark grey bars)<sup>28</sup>. (d) Thermal denaturation  
207 profiles of RBD *E. coli* (green), insect (blue), and HEK-293 (black) continuously monitored  
208 by far-UV CD at 222 nm over the range 290–370 K. Data were fitted using a two-state model.

209

## 210 *ELISA assays*

211 The functionality of the RBD protein was determined through ELISA assays using  
212 plates coated with RBD produced either in *E. coli*, insect or in HEK-293 cells. First, to test  
213 coating conditions, 50 ng/well of RBD proteins were used for coating in 50  $\mu$ L of phosphate-  
214 buffered saline (PBS) or carbonate buffer. Serially diluted (1:1000, 1:10000, 1:50000) rat  
215 sera (immunized with COVID-eVax vaccine<sup>29</sup>) were used to detect the optical density (OD)  
216 associated with antibody-RBD interaction under distinct conditions. Significant differences  
217 were observed between plates, suggesting that PBS buffer is the most efficient buffer for  
218 coating (data not shown).

219 Subsequently, plates were coated with increasing RBD protein concentrations  
220 (ranging between 1 and 5  $\mu$ g/mL) and serum from rats previously immunized with COVID-  
221 eVax<sup>29</sup> vaccine was applied to each plate for RBD protein binding. Of note, independently  
222 from protein concentration (1, 3 and 5  $\mu$ g/mL) both insect-RBD and HEK-293-RBD were  
223 efficiently recognized by rat IgG, whereas rat IgG-*E. coli*-RBD interaction was much lower  
224 (Figure 3(a)). The observed differences between RBD produced in *E. coli* and in insect or  
225 mammalian counterparts are probably due to the major affinity of the latter ones to the IgG  
226 produced in rats.

227 We also monitored the interaction between RBD and a commercial antibody against  
228 the S1 subunit of SARS-CoV-2 Spike. As shown in Figure 3(b), the observed OD signal of  
229 insect-RBD was not markedly different from that of HEK-293-RBD although at  
230 concentrations < 1  $\mu$ g/mL, RBD from insect showed a slightly higher binding ability  
231 compared to HEK-293-RBD (Suppl. Figure 3(a),(b)). In contrast, *E. coli*-RBD showed a lower  
232 binding compared to HEK-293 and insect RBDs. We hypothesized that this lower binding

233 ability of RBD produced in *E. coli* may, again, be due to the presence of a sub-population of  
234 the protein that failed refolding.

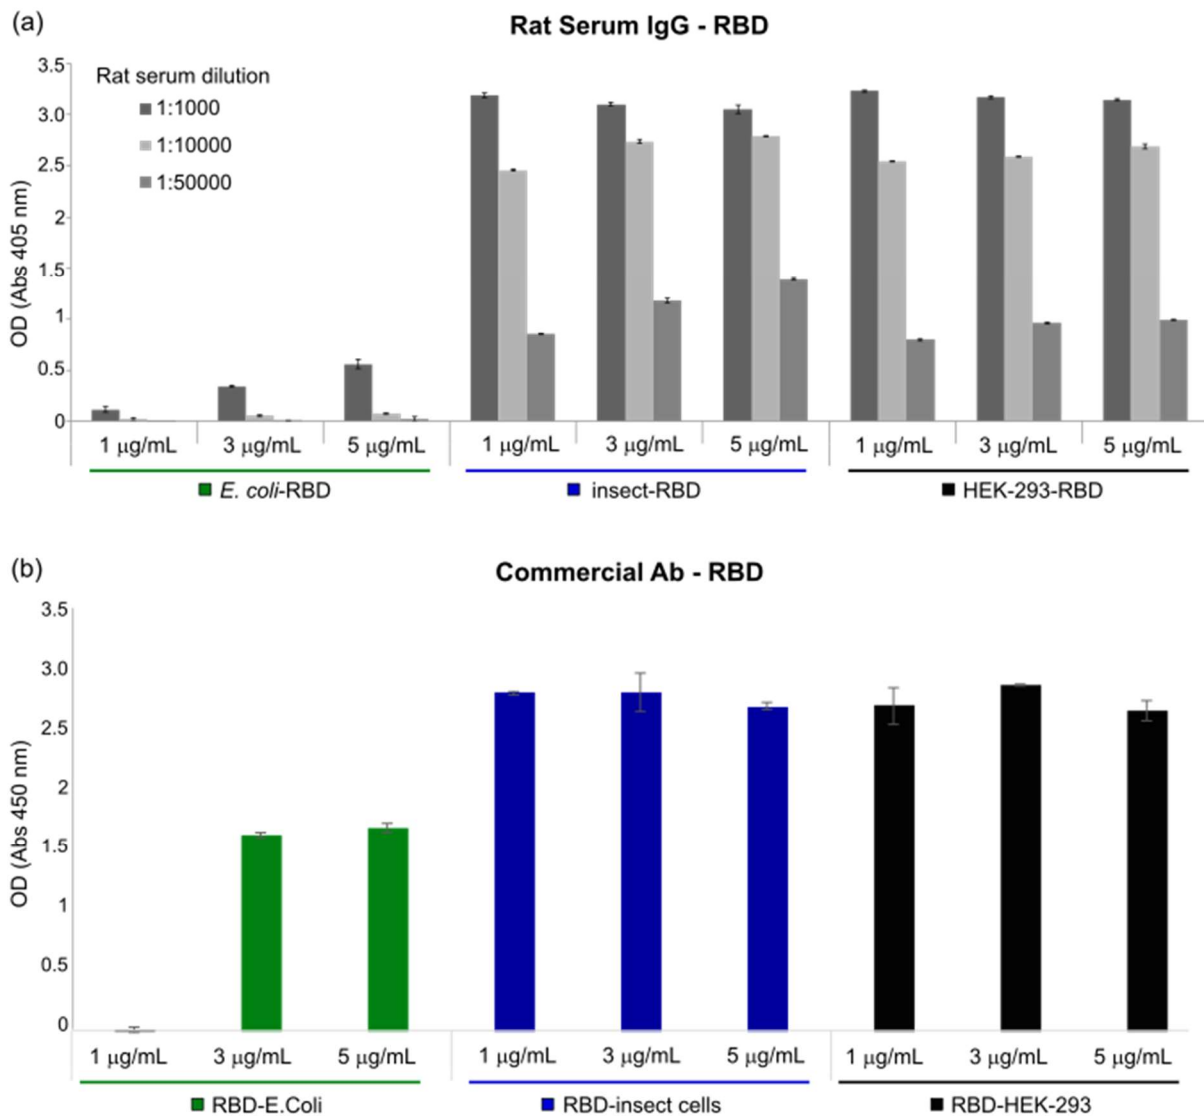

235

236 **Figure 3. Indirect ELISA assays** (a) Serum from immunized rat with COVID-eVax was  
237 used to compare different concentrations (1, 3, 5 µg/mL) of RBD expressed in *E. coli* (green),  
238 insect (blue) and HEK-293 cells (black). The y-axis represents the optical density (OD)  
239 measured at 405 nm while the x-axis accounts for RBD concentrations and serum dilution  
240 factors (1:1000, 1:10000, 1:50000). Bars indicate standard deviations. (b) Commercial  
241 antibody against the S1 subunit of SARS-CoV-2 Spike was used to compare different  
242 concentrations (1, 3, 5 µg/mL) of RBD produced in *E. coli* (green), insect (blue) and HEK-

243 293 cells (black). Optical density (OD) was measured at 450 nm and bars indicate standard  
244 deviations.

245

#### 246 *Flow cytometry assay*

247 The receptor binding ability and functionality of RBDs produced in the three presented  
248 model systems were further investigated through flow cytometry. Vero E6 cells have been  
249 shown to express ACE2 receptor on their apical membrane and to be susceptible to SARS-  
250 CoV-2 infection<sup>30,31</sup>. Thus, we tested RBD-ACE2 binding by incubating recombinant RBD  
251 proteins with cultured Vero E6 cells. Figure 4 shows that all the three studied RBDs were  
252 able to efficiently bind Vero E6 cells, while no signal was observed when cells were  
253 incubated only with antibodies (Suppl. Figure 4). This result suggests that recombinant RBD  
254 proteins are efficient in recognizing ACE2.

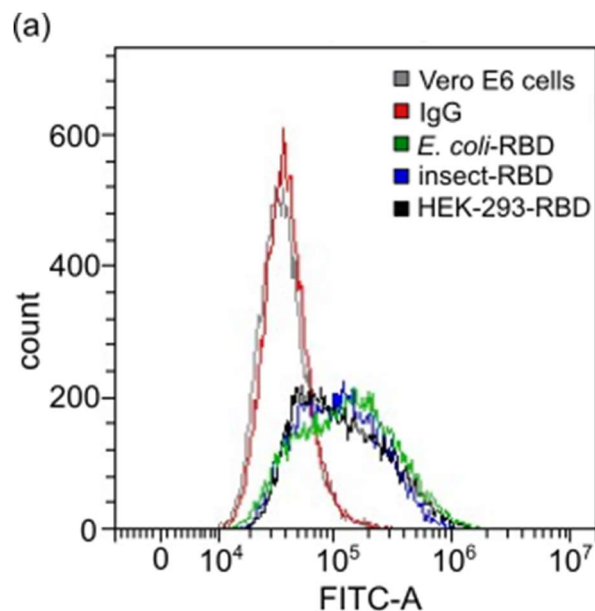

|                | <b>Geometric Mean (MFI)</b> |
|----------------|-----------------------------|
| Vero E6        | 37617.1                     |
| IgG            | 40232                       |
| <i>E. coli</i> | 115218                      |
| Insect         | 109547.3                    |
| HEK-293        | 115657.9                    |

255

256 **Figure 4. Flow cytometry assays.** RBD-Vero E6 cells binding experiment. (a) Gray curve:  
257 Vero E6 cells alone; Red curve: Vero E6 cells incubated with only secondary antibody;  
258 Green curve: Vero E6 cells incubated with *E. coli*-RBD; Blue curve: Vero E6 cells incubated  
259 with Insect-RBD; Black Curve: Vero E6 cells incubated with HEK-293-RBD. Incubation with  
260 RBD was followed by anti-RBD primary antibody and secondary antibody. Table represents  
261 the intensity of the staining measured as geometric mean (median fluorescence intensity,  
262 MFI) value.

263

264 *Bio-Layer interferometry binding assay*

265 Finally, the binding affinity to ACE-2 receptor of the RBD produced in *E. coli*, insect  
266 and HEK-293 cells was evaluated using bio-layer interferometry (BLI). ACE2-hFc fusion  
267 protein was immobilized onto anti-human Fc biosensor and different concentrations of RBD  
268 proteins (range 150 nM – 9.8 nM) were tested to obtain association curves. After fitting, the  
269 dissociation constant ( $K_d$ ) of ACE2-hFc to insect-RBD and to HEK-293-RBD was determined  
270 to be  $7.49 \cdot 10^{-9}$  M and  $5.34 \cdot 10^{-10}$  M, respectively, while much lower binding affinity was  
271 observed for *E. coli*-RBD ( $K_d = 1.21 \cdot 10^{-6}$  M) (Figure 5(a),(b) and Suppl. Figure 5).

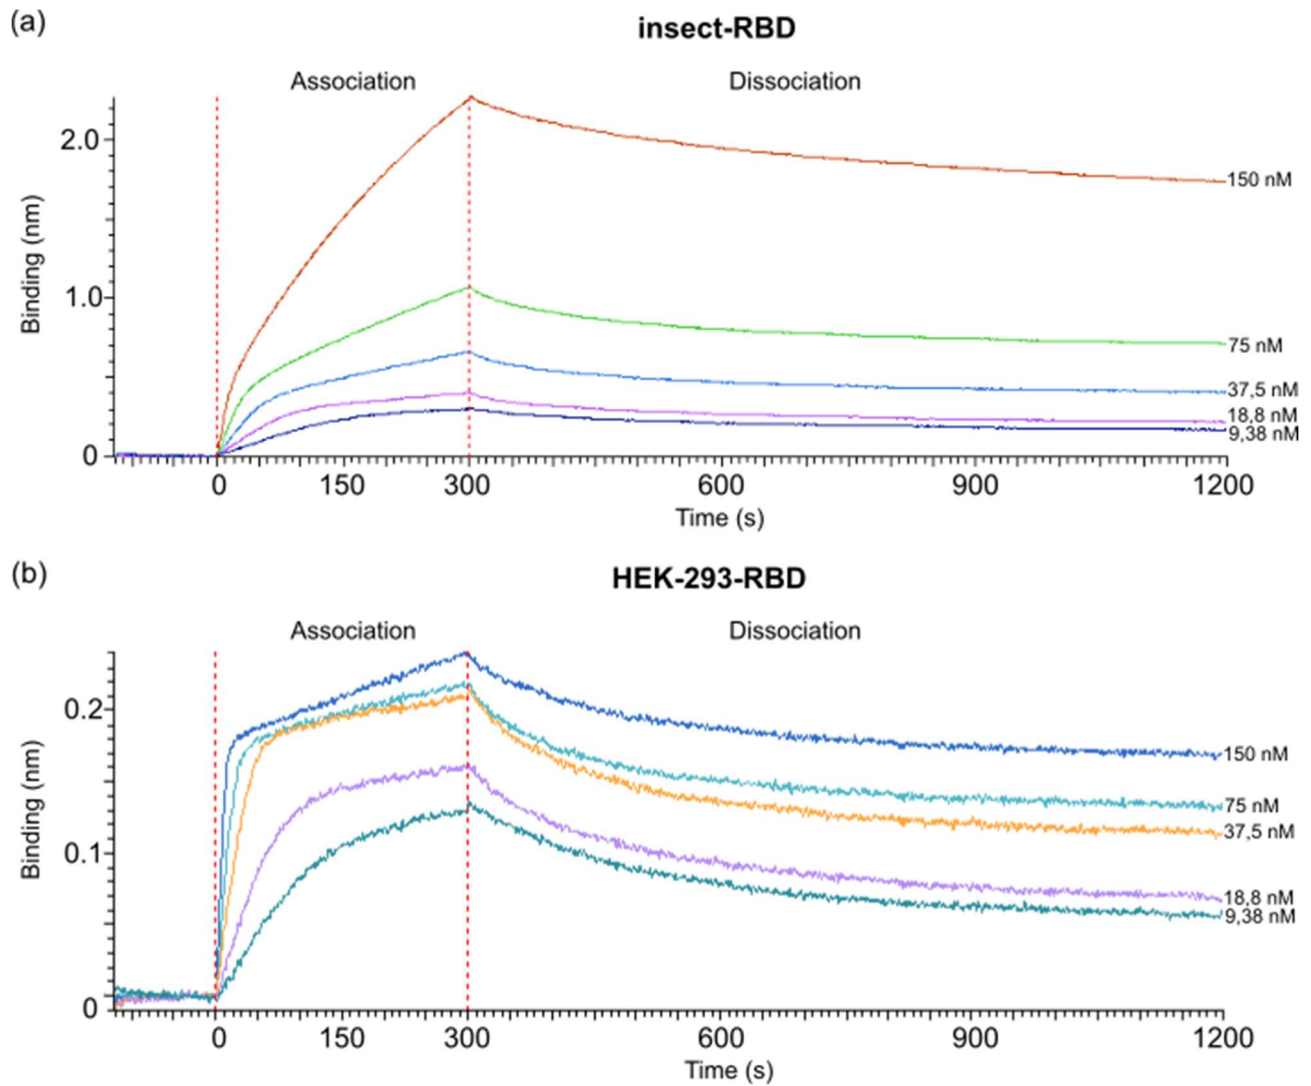

| Model System | $K_d$ (M)              |
|--------------|------------------------|
| Insect cells | $7,49 \times 10^{-9}$  |
| HEK-293      | $5,34 \times 10^{-10}$ |

272

273 **Figure 5. BLI measurements.** (a) BLI profiles accounting for the binding of insect-RBD and  
274 (b) HEK-293-RBD to ACE2-hFc. After a baseline, the sensorgram starts with the association  
275 (0 - 300 s) of RBD to the ACE2 loaded sensor, followed by the dissociation phase (900 s).

276



## 277 **Discussion**

278           The emergence of the novel SARS-CoV-2 pathogen at the end of 2019, which has  
279 quickly degenerated into a pandemic, has underlined the importance of immediate and  
280 responsive actions from the local governments, health authorities, and the world scientific  
281 community in order to tackle this situation that probably represents the biggest challenge  
282 that modern society has faced. As a result, during the last two years, several vaccines have  
283 been developed and many drugs are currently under screening or evaluation in clinical  
284 trials<sup>32-34</sup>. Most of those therapeutics targets the Spike protein and more specifically its  
285 receptor-binding domain, which is exposed on the viral envelope and that is directly involved  
286 in receptor-binding and cell-entry. Moreover, both full-length Spike and RBD are widely used  
287 as viral antigens for diagnostic tests representing a critical tool for a fast response to the  
288 pandemic.

289           In this study, we provide technical insights into the heterologous expression,  
290 purification, and characterization of the native SARS-CoV-2 RBD produced in *E. coli*, insect  
291 and HEK-293 model systems. Bacterial RBD production was achieved by recovering the  
292 protein from the insoluble fraction and through a careful process of refolding. Efforts to  
293 increase its solubility by using Lemo21 *E. coli* strain failed in agreement with previous  
294 attempts to produce this protein, or its ancestor (SARS-CoV RBD), in *E. coli* in its native  
295 soluble form<sup>21,35,36</sup>. After refolding, isolated *E. coli*-RBD showed a good degree of purity and  
296 was efficiently recognized by commercial antibodies. Considering the challenging target,  
297 final obtained yields were not high, but enough to carry out most of the lab-scale downstream  
298 applications. In contrast, production in insect and HEK-293 cells resulted in more soluble,  
299 highly glycosylated RBD proteins with yields up to 60 mg/L. The presence of post-  
300 translational modifications (glycosylations) in the latter samples was indirectly observed by  
301 SDS-PAGE, mass-spectrometry analysis, and size-exclusion chromatography. The nature

302 and the type of glycosylation was not further investigated. Of note, although the far-UV-CD  
303 spectrum profile of the RBD from *E. coli* appears different from the one observed for HEK-  
304 293-RBD and insect, the overall distribution of the secondary structure composition and the  
305 measured  $T_m$  were similar among the three samples, suggesting that most of the RBD  
306 expressed in bacteria recovers the proper fold, homogeneity, and conformational stability  
307 even though lacking glycosylations.

308 RBD functionality was demonstrated *in-vitro* using Enzyme-linked immunosorbent  
309 assay (ELISA). RBD produced in *E. coli* displayed a weak binding affinity to IgG produced  
310 in rats and to commercially available antibodies while efficient response was observed for  
311 both insect and mammalian derived RBDs. Remarkably, at lower concentration ( $< 1 \mu\text{g/mL}$ ),  
312 insect-RBD gave a slightly better signal than HEK-293-RBD. We also investigated the  
313 capability of isolated RBDs to bind the ACE2 receptor. All the RBDs produced in this work  
314 efficiently bind to Vero E6 cells as confirmed by FACS assay. ACE2-RBD binding was further  
315 confirmed and quantified by bio-layer interferometry, with the bacterial-RBD displaying again  
316 the lowest binding efficiency. Our data suggest that the absence of glycosylations could  
317 partially affect ACE-2 binding *in-vitro* as also previously observed<sup>10</sup>. In addition to this, we  
318 must consider that the presence of a sub-population of protein that failed refolding, as  
319 indicated by circular dichroism and ELISA assays, might also contribute to the observed  
320 lower binding efficiency of the bacterial RBD.

321 To summarize, this work offers a technical and practical overview of RBD production  
322 using the three most widely used expression systems, highlighting the main advantages and  
323 drawbacks, reported in Table 1. RBD obtained from both eukaryotic systems resulted in a  
324 high-quality final bioproduct potentially eligible for diverse downstream applications (vaccine  
325 design, diagnostic kits, drug screening etc.). However, the high costs (resources), the time-  
326 consuming production, the requirement of specific equipment, and access to dedicated

327 facilities could be a limitation for many laboratories or for the industrial production. By  
328 contrast, the bacterial-derived RBD offers a low production cost, a broader availability, and  
329 easy handling as main advantages, which make it more accessible. However, limitations in  
330 the quality of the produced sample include the absence of glycosylation that partially affects  
331 protein stability and efficiency, the presence of heterogeneous folded populations, and the  
332 relative low production yields which may result in a final product not eligible for some clinical  
333 and medical applications. Overall, all the recombinantly produced RBDs represent valuable  
334 tools for research purposes against the pandemic. Recently, expression and purification  
335 strategies described in this article have been also proved to be successful in the production  
336 of mutants of RBD corresponding to the variants of concern.

| Model System | Cost   | Production time | Yields | Glycosylation | Folding | ELISA | FACS | ACE-2 receptor binding |
|--------------|--------|-----------------|--------|---------------|---------|-------|------|------------------------|
| ■ E. Coli    | Low    | ≤ 1 week        | +      | No            | ++      | +     | ++   | +                      |
| ■ Insect     | Medium | 2-3 weeks       | ++     | Yes ++        | +++     | +++   | +++  | +++                    |
| ■ HEK-293    | High   | 2-3 weeks       | +++    | Yes +++       | +++     | +++   | +++  | +++                    |

337

338 **Table 1. Overview of the main aspects of RBD produced in the three major model**  
339 **systems.**

340

## 341 **Material and Methods**

### 342 *RBD protein production in E. coli*

343 The SARS-CoV-2 Spike Receptor Binding Domain sequence (aa 319-541, Uniprot  
344 ID P0DTC2) was cloned with a C-terminal 6x-His tag into a pET-21a(+) plasmid. *E. coli* BL21  
345 Star<sup>TM</sup> (DE3) (genotype: F-ompT hsdS<sub>B</sub> (r<sub>B</sub><sup>-</sup>, m<sub>B</sub><sup>-</sup>) gal dcmrne131) competent cells, and *E. coli*  
346 Lemo21 (DE3) (genotype: fhuA2 [lon] ompT gal (λ DE3) [dcm] ΔhsdS/ pLemo(Cam<sup>R</sup>))  
347 competent cells were transformed with 100 ng of plasmid of interest. A single colony was  
348 incubated in 15 mL starter culture (LB) with Ampicillin (BL21 Star strain) or

349 Ampicillin/Chloramphenicol (Lemo21 strain), grown at 37°C on agitation over-night. Starter  
350 culture was successively inoculated in 500 mL (LB) with antibiotics incubated at 37°C until  
351 mid-log phase ( $OD_{600} = 0.6$  to  $0.8$ ). Protein expression was induced with  $0.5$  mM isopropyl  
352  $\beta$ -D-1-thiogalactopyranoside (IPTG) at 30°C or 37°C for 4 hours on agitation. Cells were  
353 harvested at 6'000 rpm for 10 minutes, washed once with 50 mM Tris·HCl (pH 8.0) and then  
354 further centrifuged. Pellet was resuspended in a solution containing 50 mM Tris·HCl, 500  
355 mM NaCl (pH 8.0) also containing a protease inhibitor cocktail (Roche 11836170001) prior  
356 sonication. The suspension was then centrifuged at 11'000 rpm for 45 minutes to separate  
357 soluble and insoluble fractions. The pellet containing the RBD target protein was  
358 resolubilized in extraction buffer containing 50 mM Tris·HCl, 500 mM NaCl, 20% glycerol,  
359 10 mM  $\beta$ -mercaptoethanol, 8 M urea (pH 8.0). The washed inclusion bodies were shortly  
360 sonicated and left 1 h at room temperature (RT) or O/N at 4°C on agitation. Protein was  
361 purified using IMAC (His-Trap, Cytiva) under denaturing conditions (Elution buffer: 50 mM  
362 Tris·HCl, 500 mM NaCl, 20% Glycerol, 10 mM  $\beta$ -Mercaptoethanol, 6 M urea, 300 mM  
363 imidazole pH 8.0). Eluted fractions were analysed by SDS-PAGE and firstly dialyzed over-  
364 night against buffer containing 50 mM Tris·HCl, 500 mM NaCl, 20% Glycerol, GSH-GSSG  
365 (3 mM : 1 mM), 2 M urea (pH 8.0) with slow agitation. The day after, protein solution was  
366 dialyzed against 50 mM Tris·HCl, 500 mM NaCl, 1 mM TCEP (pH 8.0) or PBS 1x (pH 7.4)  
367 for 4 hours. The purified *E. coli*-RBD sample protein was quantified by UV-visible  
368 spectroscopy, aliquoted, and stored at -80°C.

369

### 370 *RBD protein production in insect cells*

371 The SARS-CoV-2 Spike Receptor Binding Domain sequence (aa 319-541, Uniprot  
372 ID P0DTC2) was cloned into a pFAST-bac1 plasmid downstream of the gp64 signal  
373 sequence to promote secretion, along with a C-terminal 8x-His tag for affinity purification.

374 100 ng of plasmid was transformed into DH10Bac competent cells (MAX Efficiency™  
375 DH10Bac Competent Cells, Gibco #10361012) for bacmid DNA production. Each bacmid,  
376 extracted from 3 mL of an O/N colony culture, was diluted in a final volume of 220 µL of  
377 Sf900 III medium and then combined with a mix of 10 µL of XtremeGene (Cellfectin™ II  
378 Reagent, Gibco #10362100) in 100 µL Sf900 III medium. This solution was left 15 minutes  
379 at room temperature to allow complex formation, according to the manufacturer's protocol.  
380 For transfection, the latter solution was added dropwise onto Sf21 cells (Gibco #11497013)  
381 previously plated on a 6-well plate at  $1.0 \times 10^6$  cells/well confluency. 60 hours post-  
382 transfection, supernatant containing the first generation of recombinant baculovirus ( $V_0$ ) was  
383 harvested and amplified to obtain a high titer of virus. Hi-5 cells (BTI-TN-5B1-4) (Gibco  
384 #B85502) were cultured in Express Five™ SFM (Serum-Free Media) medium (Gibco #  
385 B85502 Expression Systems) at a cell density of  $0.5 \times 10^6$  cells/mL and infected with  
386 recombinant virus. Cells were kept at 27°C and 130 rpm for protein expression. After 72  
387 hours, supernatant containing secreted RBD was collected and subjected to IMAC (His-Trap  
388 Excel, Cytiva). RBD was eluted using 50 mM Tris·HCl, 150 mM NaCl, 300 mM imidazole,  
389 pH 8.0). Eluted fractions were analysed on 4-12% SDS-PAGE and dialyzed over-night  
390 against 50 mM Tris·HCl, 150 mM NaCl, pH 8.0 with slow agitation. Purified RBD protein was  
391 quantified by UV-visible spectroscopy, aliquoted, and stored at -80°C.

392

### 393 *RBD protein production in HEK-293 cells*

394 C-terminal 6x-His tagged SARS-CoV-2 RBD fragment (aa 319-541, Uniprot ID  
395 P0DTC2) was cloned downstream of the Ig Kappa chain-signal peptide for expression as  
396 secreted protein in mammalian cells (Expi293). Cells were transfected at a concentration of  
397  $\sim 3 \times 10^6$ /mL with 1 µg of DNA per milliliter of cell culture. Feed enhancers and PEN-STREP  
398 were added to the cells after 20 and 24 hours, respectively. Cells were left in agitation at

399 37°C for 1 week before clarification by centrifugation at 12700 rcf. After filtration, the RBD-  
400 containing supernatant was purified by affinity chromatography on a 1 mL INDIGO column  
401 (Cube Biotech). Sample was diluted with binding buffer (20 mM NaPi, pH 7.4, 500 mM NaCl)  
402 and loaded at 1 mL/min flowrate. Elution was carried out in the same conditions, with a  
403 single step of 250 mM imidazole (20 mM NaPi, pH 7.4, 500 mM NaCl, 250 mM Imidazole).  
404 Eluted protein was readily dialyzed against DPBS 1x. Isolated RBD protein was quantified  
405 by UV-visible spectroscopy, aliquoted, and stored at -80°C.

406

#### 407 *Mass-spectrometry analysis*

408 SARS-CoV-2 RBD recombinant protein(s) molecular weight and primary aminoacidic  
409 sequence were determined by MALDI-MS and by peptide mass fingerprint (PMF),  
410 respectively. Determination of the molecular weight was achieved by MALDI mass  
411 spectrometry analysis on a MALDI Ultraextreme (Bruker, GmbH) in positive linear mode. 30  
412  $\mu$ L of sample were desalted by diafiltration using Amicon filters with 3.5 kDa MWCO or by  
413 Zip Tip C18 (Millipore) and 2  $\mu$ L of sample were mixed with a solution of the matrix  
414 superDHB. A volume of 2  $\mu$ L of the resulting solution were deposited on the target plate and  
415 left dry in the air.

416 In order to acquire information on the primary aminoacidic sequence, an aliquot of  
417 each sample was reduced, alkylated, digested with trypsin, and analysed by RP-UHPLC-  
418 MS/MS. RP-UHPLC-MS analysis was performed on a Q-Exactive HF-X (ThermoFisher  
419 Scientific) mass spectrometer coupled with an UHPLC Ultimate 3000 RSLCnano System  
420 (ThermoFisher Scientific). A volume of 1  $\mu$ L of the resulting peptide mixtures were injected  
421 on a column EasySpray PepMap RSLC C18 100 Å 2  $\mu$ m, 75  $\mu$ m x 15 cm (Thermo Fisher  
422 Scientific). The column oven was maintained at 35°C, the analysis was carried using a  
423 gradient elution (phase A: 0.1% formic acid in water; phase B: 0.1% formic acid in

424 acetonitrile). The flow rate was maintained at 300 nL/min. The mass spectra were acquired  
425 using a “data dependent scan”, able to acquire both the full mass spectra in high resolution  
426 and to “isolate and fragment” the twelve ions with highest intensity present in the mass  
427 spectrum. Raw data were analyzed using the Biopharma Finder 2.1 software from  
428 ThermoFisher Scientific.

429

#### 430 *SDS-PAGE and Western blot*

431 Purified proteins (500 ng) were analyzed on 4-12% NuPAGE Bis-Tris gels (Life  
432 Technologies) under reducing conditions followed by Coomassie Brilliant Blue staining  
433 (Invitrogen LC6060). For Western blot analysis, gels were electroblotted onto nitrocellulose  
434 membranes (Bio Rad). Blots were incubated with primary antibodies in 5% non-fat dry milk  
435 in PBS plus 0.1% Tween20 overnight at 4°C. Detection was achieved using horseradish  
436 peroxidase-conjugate secondary antibody anti-rabbit and anti-mouse (Bio Rad #1706516,  
437 #1706515) and visualized with ECL (Cytiva RPN2232). Images were acquired by using a  
438 ChemiDoc™ Touch Imaging System (Bio Rad) and analyzed by Image Lab software (Bio  
439 Rad).

440

#### 441 *Antibodies*

442 The primary antibodies used in this study are: rabbit anti-SARS-CoV-2 Spike S1  
443 Subunit (Sino Biological, 40150-T62), mouse anti-His Tag (Invitrogen MA1-21315).  
444 Secondary antibody used are: horseradish peroxidase-conjugate anti-rabbit and anti-mouse  
445 (Bio Rad #1706516, #1706515).

446

447 *Densitometric analysis*

448            Intensities of bands corresponding to RBD proteins were measured using Gel Doc  
449 2000 and Image Lab software (Bio-Rad, Hercules, CA, USA) in order to measure protein  
450 expression levels. Briefly, blots were acquired using the Gel Doc 2000 apparatus; images  
451 were imported into the Image Lab software; contrast was adjusted such that the bands were  
452 clearly visible on the blot image; area around each band was selected; background intensity  
453 was subtracted from the blot image; bands were then selected by drawing a tight boundary  
454 around them; intensities of the selected bands were exported in excel format file which was  
455 used to perform further analysis.

456

457 *ELISA assay*

458            ELISA plates were coated with different concentrations of *E. coli*-RBD, Insect-RBD  
459 and HEK-293-RBD proteins. After washing and blockade of free protein-binding sites with  
460 PBS – 0.05% Tween20 - 3% BSA, different concentrations of rat serum (immunized with  
461 COVID-eVax vaccine) or anti-SARS-CoV-2 Spike S1 Subunit antibody (Sino Biological,  
462 40150-T62) were added to each well and incubated overnight at 4°C in PBS – 0.05%  
463 Tween20 - 1% BSA. After washing, AP-conjugated goat anti-rat IgG antibody (SIGMA  
464 A8438) or AP-conjugated goat anti-rabbit IgG antibody (SIGMA A8025) was added, and the  
465 plates were further incubated for 1 hour at RT. Finally, 3,3',5,5'-Tetramethylbenzidine (TMB)  
466 Liquid Substrate System (Sigma T8665) or alkaline Phosphatase Yellow (pNPP) Liquid  
467 Substrate System for Elisa (Sigma P7998) were added as a substrate. After 30 minutes the  
468 TMB reaction was stopped with the stop reagent for TMB substrate (Sigma S5814) and the  
469 absorbance was measured at 450 nm, while the pNPP reaction was measured at 405nm at  
470 different time points.



471

## 472 *FACS*

473 Vero E6 cells were incubated with RBD protein (0.45 µg/mL, final concentration)  
474 followed by incubation with human anti-RBD antibody (primary antibody) (40150-D003, Sino  
475 Biological) and goat anti-human IgG AF488-conjugated antibody (secondary antibody) (A-  
476 11013, Thermo Fisher Scientific). Staining with only secondary antibody was used to  
477 determine the level of background due to non-specific antibody binding. Each staining step  
478 was performed at 4°C for 20 minutes in FACS buffer. Samples were run on a CytoFlex flow  
479 cytometer (Beckman Coulter). Analysis was performed using the CytExpert software  
480 (Beckman Coulter).

481

## 482 *CD static spectra and thermal denaturation*

483 Far-UV (200-250 nm) circular dichroism (CD) spectra of the SARS-CoV-2 HEK-293-  
484 RBD and (insect) were recorded using 0.6 mg/mL protein solution in PBS pH 7.4 and 0.3  
485 mg/mL protein solution in 50 mM Tris·HCl, 150 mM NaCl, respectively. CD spectra of the *E.*  
486 *coli*-RBD were monitored at 0.5 mg/mL protein concentration in 50 mM Tris·HCl, 150 mM  
487 NaCl, 1 mM TCEP, 20% glycerol, pH 8. All CD static spectra were collected at 20°C,  
488 scanning at 50 nm/min, using a 0.1 cm path length quartz cuvette (Hellma, Plainview, NY)  
489 and a JASCO-815 spectropolarimeter equipped with a Jasco programmable Peltier element  
490 (Jasco, Easton, MD, USA). For each sample five scans were averaged and scans  
491 corresponding to buffer solution were averaged and subtracted from the sample spectra.  
492 Results are expressed as the molar ellipticity ( $[\theta]$ ). The formula used to calculate the molar  
493 ellipticity is:  $[\theta] = (\theta \times MW)/(C \times L \times 10)$ , where  $[\theta]$  is the molar ellipticity,  $\theta$  the experimental  
494 ellipticity in mdeg, MW the molecular weight of the protein in Daltons, C the protein

495 concentration in mg/mL, and L the path length of the cuvette in cm. Secondary structure  
496 composition was assessed using the BeStSel analysis server<sup>37,38</sup>.

497 CD thermal denaturation experiments were followed at 222 nm, heating from 20 to  
498 90°C at a rate of 1 °C min<sup>-1</sup> controlled by a Jasco programmable Peltier element (Jasco,  
499 Easton, MD, USA). The dichroic activity at 222 nm and the photomultiplier voltage (PMTV)  
500 were continuously monitored in parallel every 1.0 °C<sup>39</sup>. Data were fitted to a standard two-  
501 state denaturation<sup>40</sup>, according to the equation (1):

$$502 \quad \Delta G_{D-N} = \Delta H_m \left(1 - \frac{T}{T_m}\right) + \Delta C_p \left[T - T_m - \left(T \ln \frac{T}{T_m}\right)\right]$$

503 where  $\Delta G_{D-N}$  is the free energy of the unfolding process,  $T_m$  is the melting temperature that  
504 corresponds to midpoint of the thermal denaturation,  $\Delta H_m$  is the enthalpy of denaturation at  
505 the transition midpoint, and  $\Delta C_p$  is the change of heat capacity of denaturation. The latter  
506 parameter is related to the amount of hydrophobic area that becomes exposed to solvent  
507 upon unfolding and it is constant for a given protein. To a first approximation, the melting  
508 temperature ( $T_m$ ) of unfolding has been estimated using the  $\Delta C_p$  value reported for a  $\alpha$ -  
509 chymotrypsin (241 amino acids)<sup>41</sup>. All denaturation experiments were performed in triplicate.

510

### 511 *Size exclusion chromatography*

512 Analytical gel filtration chromatography was performed using a Superdex 200  
513 Increase 10/300 GL SEC column (Cytiva, USA) coupled to an HPLC system (Azura System,  
514 Knauer- Berlin, Ge) equipped with a UV-vis absorbance detector (Smartline 2520, Knauer-  
515 Berlin, Ge). The column was equilibrated with 50 mM Tris·HCl pH 8.0, containing 150 mM  
516 NaCl. A total of 40  $\mu$ g of HEK-293-RBD, 47  $\mu$ g of Insect-RBD and 40  $\mu$ g of *E. coli*-RBD were  
517 injected into the column and eluted at a flow rate of 0.75 mL/min in isocratic mode. Elution  
518 profile was followed at 280 nm at room temperature. The shape of the elution profiles and

519 the difference between HEK-293-RBD, Insect-RBD, and RBD (*E. coli*) were observed  
520 reproducibly in three independent experiments.

521

## 522 *Bio-layer interferometry (BLI)*

523 Binding studies were carried out using the Octet Red system (Forte Bio). All steps  
524 were performed at 25°C with shaking at 600 rpm in a 96-well plate (microplate 96 well, F-  
525 bottom, black, 655209, from Greiner bio-one) containing 200 µL of solution in each well.  
526 Kinetics buffer 1x (cat. No.18-1105, Forte Bio) was used throughout this study for samples  
527 dilution and for sensors washing.

528 Kinetic assays were performed by first capturing ACE2-hFc using anti-human Fc  
529 Octet biosensors (Anti-human IgG Fc Capture Biosensors, cat. No. 18-5060, FORTEBIO).  
530 Biosensors were soaked for 10 min in 1x kinetic buffer followed by a baseline signal  
531 measurement for 60 s and then loaded with ACE2-hFc recombinant protein (10 µg/mL) for  
532 300 s (until the biosensor was fully saturated). After a wash step in 1× kinetic buffer for 120  
533 s, the ACE2-Fc-captured biosensor tips were then submerged for 300 s in wells containing  
534 different concentrations of antigen (RBD *E. coli*, insect, and HEK-293) to evaluate  
535 association curves, followed by 900 s of dissociation time in kinetic buffer. The ACE2-hFc  
536 captured biosensor tips were also dipped in wells containing kinetic buffer to allow single  
537 reference subtraction to compensate for the natural dissociation of captured ACE2-hFc.  
538 Biosensor tips were used without regeneration.

539 The binding curve data were collected and then analysed using data analysis  
540 software version 12.0 (FORTEBIO). Binding sensorgrams were first aligned at the last 5  
541 seconds of the baseline step average. The single reference subtraction binding  
542 sensorgrams were globally fit to a 1:1 Langmuir binding model to calculate  $K_d$  values.

543

544 **Conflict of interest**

545 Mariano Maffei, Grazia Vitagliano, Shaila Sellathurai, Federica Bucci, Alessia Muzi and  
546 Valerio Chiarini are employees of Takis and Evvivax companies. Mirco Compagnone is  
547 employee of NeoMatrix. Luigi Fedele is a former employee of Takis company. Giuseppe  
548 Roscilli and Emanuele Marra are co-founders of Takis and Evvivax companies.

549 The other authors declare no conflict of interest.

550

551 **Author Contributions**

552 **Mariano Maffei:** Conceptualization; Investigation; Supervision; writing-original draft; writing-  
553 review and editing. **Linda Celeste Montemiglio:** Investigation; writing-review and editing.  
554 **Grazia Vitagliano:** Investigation; editing. **Luigi Fedele:** Investigation. **Shaila Sellathurai:**  
555 Investigation. **Federica Bucci:** Investigation. **Mirco Compagnone:** Investigation. **Valerio**  
556 **Chiarini:** Investigation. **Cécile Exertier:** Investigation. **Alessia Muzi:** Investigation.  
557 **Giuseppe Roscilli:** Resources; writing-review and editing. **Beatrice Vallone:** Resources,  
558 writing-review and editing. **Emanuele Marra:** Conceptualization; Supervision; resources,  
559 writing-review and editing.

560

561 **Acknowledgments**

562 We acknowledge the assistance of L. Salvini and L.Tinti of the Toscana Life Science  
563 facilities for the support with mass spectrometry measurements and analysis of proteins.  
564 This work was supported by “Regione Lazio” (POR FESR 2014-2020, Avviso Pubblico  
565 “EMERGENZA CORONAVIRUS E OLTRE”, CUP F84E21000030006).

566 **References**

- 567 1. Lai CC, Shih TP, Ko WC, Tang HJ, Hsueh PR (2020) Severe acute respiratory syndrome  
568 coronavirus 2 (SARS-CoV-2) and coronavirus disease-2019 (COVID-19): The epidemic and  
569 the challenges. *Int. J. Antimicrob. Agents* [Internet] 55:105924. Available from:  
570 <https://doi.org/10.1016/j.ijantimicag.2020.105924>
- 571 2. Anon World Health Organization (WHO) coronavirus (2021). Available from:  
572 <https://covid19.who.int>
- 573 3. Tai W, He L, Zhang X, Pu J, Voronin D, Jiang S, Zhou Y, Du L (2020) Characterization of  
574 the receptor-binding domain (RBD) of 2019 novel coronavirus: implication for development  
575 of RBD protein as a viral attachment inhibitor and vaccine. *Cell. Mol. Immunol.* [Internet]  
576 17:613–620. Available from: <http://dx.doi.org/10.1038/s41423-020-0400-4>
- 577 4. Wang MY, Zhao R, Gao LJ, Gao XF, Wang DP, Cao JM (2020) SARS-CoV-2: Structure,  
578 Biology, and Structure-Based Therapeutics Development. *Front. Cell. Infect. Microbiol.*  
579 10:1–17.
- 580 5. Yang Y, Du L (2021) SARS-CoV-2 spike protein: a key target for eliciting persistent  
581 neutralizing antibodies. *Signal Transduct. Target. Ther.* [Internet] 6:2020–2022. Available  
582 from: <http://dx.doi.org/10.1038/s41392-021-00523-5>
- 583 6. Shamsi A, Mohammad T, Anwar S, Amani S, Khan MS, Husain FM, Rehman MT, Islam  
584 A, Hassan MI (2021) Potential drug targets of SARS-CoV-2: From genomics to therapeutics.  
585 *Int. J. Biol. Macromol.* [Internet] 177:1–9. Available from:  
586 <https://doi.org/10.1016/j.ijbiomac.2021.02.071>
- 587 7. Johnson BA, Xie X, Kalveram B, Lokugamage KG, Muruato A, Zou J, Zhang X, Juelich  
588 T, Smith JK, Zhang L, et al. (2020) Furin Cleavage Site Is Key to SARS-CoV-2  
589 Pathogenesis. *bioRxiv Prepr. Serv. Biol.* [Internet]. Available from:

- 590 <http://www.ncbi.nlm.nih.gov/pubmed/32869021><http://www.pubmedcentral.nih.gov/artic>  
591 <lerender.fcgi?artid=PMC7457603>
- 592 8. Cao W, Dong C, Kim S, Hou D, Tai W, Du L, Im W, Zhang XF (2021) Biomechanical  
593 characterization of SARS-CoV-2 spike RBD and human ACE2 protein-protein interaction.  
594 *Biophys. J.* [Internet] 120:1011–1019. Available from:  
595 <https://doi.org/10.1016/j.bpj.2021.02.007>
- 596 9. Shang J, Ye G, Shi K, Wan Y, Luo C, Aihara H, Geng Q, Auerbach A, Li F (2020)  
597 Structural basis of receptor recognition by SARS-CoV-2. *Nature* [Internet] 581:221–224.  
598 Available from: <http://dx.doi.org/10.1038/s41586-020-2179-y>
- 599 10. Azad T, Singaravelu R, Taha Z, Jamieson TR, Boulton S, Crupi MJF, Martin NT, Brown  
600 EEF, Poutou J, Ghahremani M, et al. (2021) Nanoluciferase complementation-based  
601 bioreporter reveals the importance of N-linked glycosylation of SARS-CoV-2 S for viral entry.  
602 *Mol. Ther.* [Internet] 29. Available from: <https://doi.org/10.1016/j.ymthe.2021.02.007>
- 603 11. Teng S, Sobitan A, Rhoades R, Liu D, Tang Q (2021) Systemic effects of missense  
604 mutations on SARS-CoV-2 spike glycoprotein stability and receptor-binding affinity. *Brief.*  
605 *Bioinform.* [Internet] 22:1239–1253. Available from: </pmc/articles/PMC7665319/>
- 606 12. Casalino L, Gaieb Z, Goldsmith JA, Hjorth CK, Dommer AC, Harbison AM, Fogarty CA,  
607 Barros EP, Taylor BC, Mclellan JS, et al. (2020) Beyond shielding: The roles of glycans in  
608 the SARS-CoV-2 spike protein. *ACS Cent. Sci.* [Internet] 6:1722–1734. Available from:  
609 <https://dx.doi.org/10.1021/acscentsci.0c01056>
- 610 13. Lopez-Rincon A, Perez-Romero CA, Tonda A, Mendoza-Maldonado L, Claassen E,  
611 Garssen J, Kraneveld AD (2021) Design of Specific Primer Sets for the Detection of B.1.1.7,  
612 B.1.351 and P.1 SARS-CoV-2 Variants using Deep Learning. *bioRxiv* [Internet]  
613 70:2021.01.20.427043. Available from: <https://doi.org/10.1101/2021.01.20.427043>

- 614 14. Lai S, Floyd J, Tatem A (2021) WorldPop : Preliminary risk analysis of the international  
615 spread of new COVID-19 variants. Available from:  
616 [https://www.worldpop.org/events/covid\\_variants](https://www.worldpop.org/events/covid_variants)
- 617 15. Singh J, Samal J, Kumar V, Sharma J, Agrawal U, Ehtesham NZ, Sundar D, Rahman  
618 SA, Hira S, Hasnain SE (2021) Structure-function analyses of new sars-cov-2 variants  
619 b.1.1.7, b.1.351 and b.1.1.28.1: Clinical, diagnostic, therapeutic and public health  
620 implications. *Viruses* [Internet] 13:439. Available from: <https://doi.org/10.3390/v13030439>
- 621 16. Anon Tracking SARS-CoV-2 variants. Available from:  
622 <https://www.who.int/en/activities/tracking-SARS-CoV-2-variants/>
- 623 17. Soltani-Zangbar MS, Aghebati-Maleki L, Hajivalili M, Haji-Fatahaliha M, Motavalli R,  
624 Mahmoodpoor A, Kafil HS, Farhang S, Pourakbari R, Jadidi-Niaragh F, et al. (2021)  
625 Application of newly developed SARS-CoV2 serology test along with real-time PCR for early  
626 detection in health care workers and on-time plasma donation. *Gene Reports* 23:101140.
- 627 18. Frumence E, Lebeau G, Viranaicken W, Dobi A, Vagner D, Lalarizo Rakoto M,  
628 Sandenon Seteyen A-L, Giry C, Septembre-Malaterre A, Raffray L, et al. (2021) Robust and  
629 low-cost ELISA based on IgG-Fc tagged recombinant proteins to screen for anti-SARS-CoV-  
630 2 antibodies. *J. Immunol. Methods* [Internet] 495:113082. Available from:  
631 <https://linkinghub.elsevier.com/retrieve/pii/S0022175921001277>
- 632 19. Salvatori G, Luberto L, Maffei M, Aurisicchio L, Roscilli G, Palombo F, Marra E (2020)  
633 SARS-CoV-2 spike protein: An optimal immunological target for vaccines. *J. Transl. Med.*  
634 [Internet] 18:222. Available from: <https://doi.org/10.1186/s12967-020-02392-y>
- 635 20. Amanat F, Stadlbauer D, Strohmeier S, Nguyen THO, Chromikova V, McMahon M, Jiang  
636 K, Arunkumar GA, Jurczyszak D, Polanco J, et al. (2020) A serological assay to detect  
637 SARS-CoV-2 seroconversion in humans. *Nat. Med.* 2020 267 [Internet] 26:1033–1036.

- 638 Available from: <https://www.nature.com/articles/s41591-020-0913-5>
- 639 21. Consortium AA (2020) Structural and functional comparison of SARS-CoV-2-spike  
640 receptor binding domain produced in *Pichia pastoris* and mammalian cells. *Sci. Rep.*  
641 10:21779.
- 642 22. Shin Y-J, König-Beihammer J, Vavra U, Schwestka J, Kienzl NF, Klausberger M, Laurent  
643 E, Grünwald-Gruber C, Vierlinger K, Hofner M, et al. (2021) N-Glycosylation of the SARS-  
644 CoV-2 Receptor Binding Domain Is Important for Functional Expression in Plants. *Front.*  
645 *Plant Sci.* 0:1154.
- 646 23. Tripathi NK (2016) Production and purification of recombinant proteins from *Escherichia*  
647 *coli*. *ChemBioEng Rev.* 3:116–133.
- 648 24. Li T, Zheng Q, Yu H, Wu D, Xue W, Xiong H, Huang X, Nie M, Yue M, Rong R, et al.  
649 (2020) SARS-CoV-2 spike produced in insect cells elicits high neutralization titres in non-  
650 human primates. <https://doi.org/10.1080/22221751.2020.1821583> [Internet] 9:2076–2090.  
651 Available from: <https://www.tandfonline.com/doi/abs/10.1080/22221751.2020.1821583>
- 652 25. Shajahan A, Supekar NT, Gleinich AS, Azadi P (2020) Deducing the N- and O-  
653 glycosylation profile of the spike protein of novel coronavirus SARS-CoV-2. *Glycobiology*  
654 [Internet] 30:981. Available from: [/pmc/articles/PMC7239183/](https://pubmed.ncbi.nlm.nih.gov/3239183/)
- 655 26. Watanabe Y, Allen JD, Wrapp D, McLellan JS, Crispin M (2020) Site-specific glycan  
656 analysis of the SARS-CoV-2 spike. *Science (80-. )*. [Internet] 369:330–333. Available from:  
657 <https://science.sciencemag.org/content/369/6501/330>
- 658 27. Mycroft-West C, Su D, Elli S, Li Y, Guimond S, Miller G, Turnbull J, Yates E, Guerrini M,  
659 Fernig D, et al. (2020) The 2019 coronavirus (SARS-CoV-2) surface protein (Spike) S1  
660 Receptor Binding Domain undergoes conformational change upon heparin binding. :1–9.
- 661 28. Lan J, Ge J, Yu J, Shan S, Zhou H, Fan S, Zhang Q, Shi X, Wang Q, Zhang L, et al.



- 662 (2020) Structure of the SARS-CoV-2 spike receptor-binding domain bound to the ACE2  
663 receptor. *Nat.* 2020 5817807 [Internet] 581:215–220. Available from:  
664 <https://www.nature.com/articles/s41586-020-2180-5>
- 665 29. Conforti A, Marra E, Palombo F, Roscilli G, Ravà M, Fumagalli V, Muzi A, Maffei M,  
666 Luberto L, Lione L, et al. (2021) COVID-eVax, an electroporated plasmid DNA vaccine  
667 candidate encoding the SARS-CoV-2 Receptor Binding Domain, elicits protective immune  
668 responses in animal models of COVID-19. *bioRxiv* [Internet]:2021.06.14.448343. Available  
669 from: <https://www.biorxiv.org/content/10.1101/2021.06.14.448343v1>
- 670 30. Ogando NS, Dalebout TJ, Zevenhoven-Dobbe JC, Limpens RWAL, van der Meer Y,  
671 Caly L, Druce J, de Vries JJC, Kikkert M, Barcena M, et al. (2020) SARS-coronavirus-2  
672 replication in Vero E6 cells: Replication kinetics, rapid adaptation and cytopathology. *J. Gen.*  
673 *Virol.* [Internet] 101:925–940. Available from:  
674 <https://www.microbiologyresearch.org/content/journal/jgv/10.1099/jgv.0.001453>
- 675 31. Ren X, Glende J, Al-Falah M, de Vries V, Schwegmann-Wessels C, Qu X, Tan L,  
676 Tschernig T, Deng H, Naim HY, et al. (2006) Analysis of ACE2 in polarized epithelial cells:  
677 Surface expression and function as receptor for severe acute respiratory syndrome-  
678 associated coronavirus. *J. Gen. Virol.* [Internet] 87:1691–1695. Available from:  
679 <https://www.microbiologyresearch.org/content/journal/jgv/10.1099/vir.0.81749-0>
- 680 32. Creech CB, Walker SC, Samuels RJ (2021) SARS-CoV-2 Vaccines. *JAMA - J. Am. Med.*  
681 *Assoc.* [Internet] 325:1318–1320. Available from: <https://jamanetwork.com/>
- 682 33. Nagy A, Alhatlani B (2021) An overview of current COVID-19 vaccine platforms. *Comput.*  
683 *Struct. Biotechnol. J.* 19:2508–2517.
- 684 34. Anon COVID-19 Studies from the World Health Organization Database -  
685 *ClinicalTrials.gov*. Available from: [https://clinicaltrials.gov/ct2/who\\_table](https://clinicaltrials.gov/ct2/who_table)

- 686 35. Chen J, Miao L, Li JM, Li YY, Zhu QY, Zhou CL, Fang HQ, Chen HP (2005) Receptor-  
687 binding domain of SARS-Cov spike protein: Soluble expression in E.coli, purification and  
688 functional characterization. *World J. Gastroenterol.* 11:6159–6164.
- 689 36. Prahlad J, Struble L, Lutz WE, Wallin SA, Khurana S, Schnaubelt A, Broadhurst MJ,  
690 Bayles K, Borgstahl GEO (2021) Bacterial expression and purification of functional  
691 recombinant SARS-CoV-2 spike receptor binding domain. *bioRxiv*  
692 [Internet]:2021.02.03.429601. Available from:  
693 <http://biorxiv.org/content/early/2021/02/03/2021.02.03.429601.abstract>
- 694 37. Micsonai A, Wien F, Kernya L, Lee Y-H, Goto Y, Réfrégiers M, Kardos J (2015) Accurate  
695 secondary structure prediction and fold recognition for circular dichroism spectroscopy.  
696 *Proc. Natl. Acad. Sci.* [Internet] 112:E3095–E3103. Available from:  
697 <https://www.pnas.org/content/112/24/E3095>
- 698 38. Micsonai A, Wien F, Bulyáki É, Kun J, Moussong É, Lee Y-H, Goto Y, Réfrégiers M,  
699 Kardos J (2018) BeStSel: a web server for accurate protein secondary structure prediction  
700 and fold recognition from the circular dichroism spectra. *Nucleic Acids Res.* [Internet]  
701 46:W315–W322. Available from:  
702 <https://academic.oup.com/nar/article/46/W1/W315/5035652>
- 703 39. Benjwal S, Verma S, Röhm K-H, Gursky O (2006) Monitoring protein aggregation during  
704 thermal unfolding in circular dichroism experiments. *Protein Sci.* [Internet] 15:635–639.  
705 Available from: <https://onlinelibrary.wiley.com/doi/full/10.1110/ps.051917406>
- 706 40. Baldwin RL (2000) *Structure and mechanism in protein science. A guide to enzyme*  
707 *catalysis and protein folding*, by A. Fersht. 1999. New York: Freeman. 631 pp. \$67.95  
708 (hardcover). *Protein Sci.* [Internet] 9:207–207. Available from:  
709 <https://onlinelibrary.wiley.com/doi/full/10.1110/ps.9.1.207>

710 41. Myers JK, Pace CN, Scholtz JM (1995) Denaturant m values and heat capacity changes:  
711 relation to changes in accessible surface areas of protein unfolding. Protein Sci. [Internet]  
712 4:2138. Available from: [/pmc/articles/PMC2142997/?report=abstract](https://pubmed.ncbi.nlm.nih.gov/15111111/)

713

#### 714 **Supporting information**

715 Additional supporting information may be found online in the Supporting Information section.

716
